# Supplementary material for: Comparative Transcriptomic and Metabolomic Analyses Reveal the Regulatory Effect and Mechanism of Tea Extracts on the Biosynthesis of Monascus Pigments
Source: MDPI journal article supplement (doi:10.3390/foods11203159), 2022-10-11

## Supplementary material-1

### Supplementary method S1.

LC-MS analysis of components in tea extracts

**Instrument model:** Accela UHPLC system (Thermo Scientific, San Jose, CA) combine with Velos Pro mass spectrometer (Thermo Scientific, San Jose, CA)

**Identification conditions:** chromatographic column: Acquity BEH C18 column (1.7  $\mu\text{m}$ , 2.1mm $\times$  100mm);

Mobile phase A: 0.1% formic acid, B: acetonitrile; Column temperature is 45  $^{\circ}\text{C}$ ; Wavelength: 200~600 nm;

Sample volume: 1.0  $\mu\text{l}$ .

gradient elution:

0 ~ 0.25min: 99% A;

0.25~12 min: 99~50% A;

12~16 min: 50~1% A;

16~20 min: 1~99% A.

**Mass spectrometry conditions:** ESI negative ion mode; ESI voltage is 2.0kv; The gas flow rate of atomizer is 6.5; The offset is 80; Ion source temperature is 120  $^{\circ}\text{C}$ , desolvation temperature melting point is 450 C, atomization gas flow rate is 800 L/h and temperature is 800 C; Testing voltage: 1600v; Scanning quality range: 100 m/z ~ 1200 m/z.

## Supplementary Table S1.

Primers for RT-qPCR analyzing MPs biosynthetic genes

| Primers          | Sequences (5'→3')           | References          |
|------------------|-----------------------------|---------------------|
| <i>β-actin F</i> | 5'-TTCGAGACCTTCAACGCCC-3'   | (Wang et al., 2012) |
| <i>β-actin R</i> | 5'-ACCCTCGTAGATGGGAACGA-3'  |                     |
| <i>MpPKS5 F</i>  | 5'-TGTCCGACGAGTTTCTGCAA-3'  | (Wang et al., 2015) |
| <i>MpPKS5 R</i>  | 5'-TATCAACGCTGCTTGGGCAT-3'  |                     |
| <i>MpFasA2 F</i> | 5'-ATGGATCGCCCGATCTTGTC-3'  | (Wang et al., 2015) |
| <i>MpFasA2 R</i> | 5'-CTTTGTCGAGTCCGCTGGAT-3'  |                     |
| <i>MpFasB2 F</i> | 5'-CCTCCAGGGATTACAACCCG-3'  | (Wang et al., 2015) |
| <i>MpFasB2 R</i> | 5'-ATTCAATGCCAGGTGCTCCA -3' |                     |
| <i>mppA F</i>    | 5'-TCCCGTTTCTTGGACGTGAG-3'  | (Wang et al., 2015) |
| <i>mppA R</i>    | 5'-ACGTGCCATGGTTCTGTCTT-3'  |                     |
| <i>mppB F</i>    | 5'-CGTCTCGCCCGATAACTTCA-3'  | (Wang et al., 2015) |
| <i>mppB R</i>    | 5'-TTGACAGACGGGTCGAAGTC -3' |                     |
| <i>mppC F</i>    | 5'-CAGTCCTCGTCCCTTCCAGT -3' | (Wang et al., 2015) |
| <i>mppC R</i>    | 5'-CCACGGTGAAGGATGTCGAG -3' |                     |
| <i>mppD F</i>    | 5'-TCAACACGGGAGATGCTGTC-3'  | (Wang et al., 2015) |
| <i>mppD R</i>    | 5'-GCCAAAGGACAGGAGCAGAT-3'  |                     |
| <i>mppE F</i>    | 5'-CTTCCCGATGCCGTTGTGAT-3'  | (Wang et al., 2015) |
| <i>mppE R</i>    | 5'-CGTCTCGTGGATCATCTCGT-3'  |                     |
| <i>mppR1 F</i>   | 5'-TCTGCAGTATGCCATGTGGG-3'  | (Wang et al., 2015) |
| <i>mppR1 R</i>   | 5'-ATGGCACCGTCACTTAGCTC-3'  |                     |
| <i>mppR2 F</i>   | 5'-ACGAAACCCTCCATGACACC-3'  | (Wang et al., 2015) |
| <i>mppR2 R</i>   | 5'-TGCAGACAGCCTTGTGGTAG-3'  |                     |

## References

- Wang, C., Chen, D., Chen, M., Wang, Y., Li, Z., Li, F., 2015. Stimulatory effects of blue light on the growth, monascin and ankaflavin production in *Monascus*. *Biotechnol. Lett.* 37, 1043–1048. doi:10.1007/s10529-014-1763-3
- Wang, C., Yang, H., Chen, M., Wang, Y., Li, F., Luo, C., Zhao, S., He, D., 2012. Real-time quantitative analysis of the influence of blue light on citrinin biosynthetic gene cluster expression in *Monascus*. *Biotechnol. Lett.* 34, 1745–1748. doi:10.1007/s10529-012-0962-z

Table S2

Overview of *Monascus* transcriptome in Con and T11 groups

| Sample | Clean reads | Clean bases | Error rate(%) | Q20(%) | Q30(%) | GC content(%) |
|--------|-------------|-------------|---------------|--------|--------|---------------|
| Con_1  | 45194782    | 6698176143  | 0.026         | 97.62  | 93.18  | 52.6          |
| Con_2  | 50446790    | 7518122982  | 0.0267        | 97.37  | 92.58  | 52.27         |
| Con_3  | 46183040    | 6887952800  | 0.0268        | 97.32  | 92.48  | 52.52         |
| T11_1  | 47779162    | 7134560832  | 0.0263        | 97.51  | 92.92  | 53.51         |
| T11_2  | 44364026    | 6609621245  | 0.0262        | 97.55  | 93.02  | 53.56         |
| T11_3  | 49019986    | 7303425179  | 0.026         | 97.61  | 93.15  | 53.08         |

Table S3

## Annotated number of expressed genes

| DEG Set       | Total   | GO       | KEGG     | COG      | NR       | Swiss-Prot | Pfam    | Total_anno |
|---------------|---------|----------|----------|----------|----------|------------|---------|------------|
| Con vs. T11   | 9058(1) | 5356     | 3502     | 8004     | 8229     | 5504       | 6549    | 8262       |
| transformants |         | (0.5913) | (0.3866) | (0.8836) | (0.9085) | (0.6076)   | (0.723) | (0.9121)   |

Table S4

Expression of key genes for *Monascus pigments* secondary metabolism

| Genes Name     | Gene ID    | Homologous genes ID (NR) | Log <sub>2</sub> (FC) |
|----------------|------------|--------------------------|-----------------------|
| <i>MpFasA2</i> | BL30022203 | AGL44429.1               | 1.18                  |
| <i>MpFasB2</i> | BL30015972 | AGL44430.1               | 1.01                  |
| <i>MpPKS5</i>  | BL30008298 | ALN44200.1               | 1.32                  |
| <i>mppA</i>    | BL30025317 | ALN44201.1               | -0.04                 |
| <i>mppB</i>    | BL30004761 | AGI63864.1               | 0.73                  |
| <i>mppC</i>    | BL30011727 | PSN75407.1               | 0.32                  |
| <i>mppD</i>    | BL30003060 | APZ73941.1               | 0.08                  |
|                | BL30022209 | APZ73942.1               | 0.06                  |
| <i>mppE</i>    | BL30012672 | APZ73943.1               | -0.08                 |
| <i>mppR1</i>   | BL30025323 | AGL44390.1               | 0.43                  |
| <i>mppR2</i>   | BL30022206 | APZ73944.1               | 0.16                  |

**Figure. S1.** Hierarchical cluster plot base on PCA

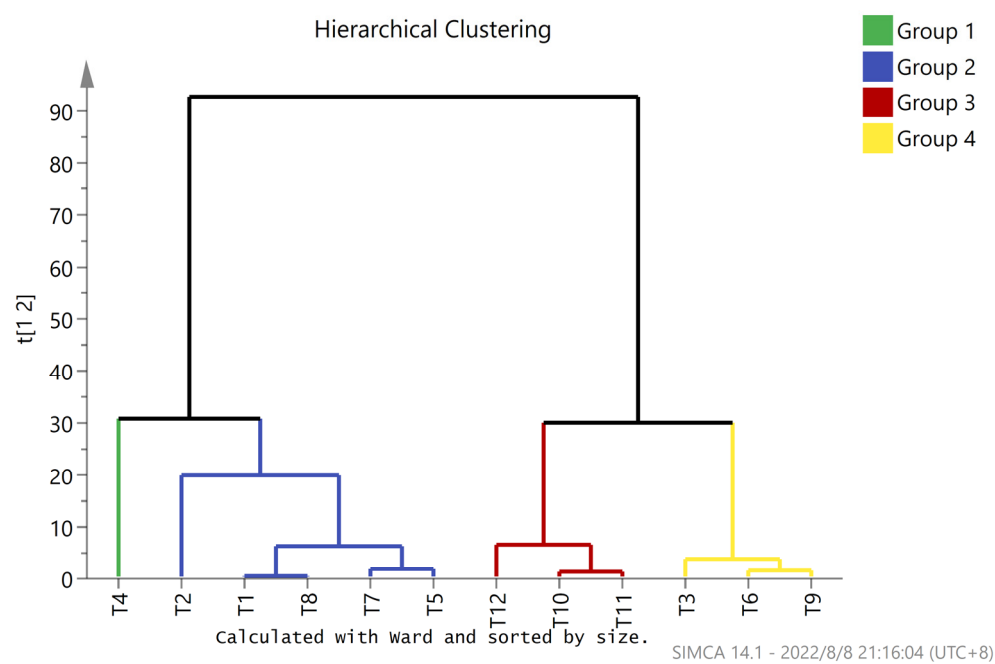

**Figure. S2**

Heat map of pearson correlction of genes and transcripts between Con and T11.

(A): Gene; B: transcript.

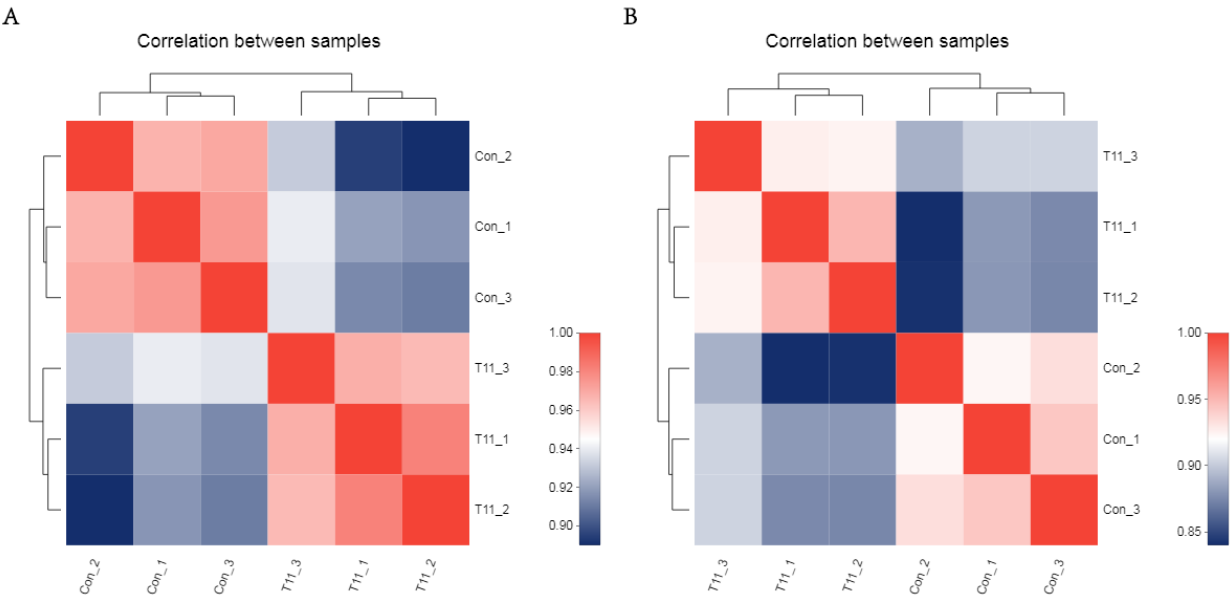

Supplement: s1 [file s1]
